# Supplementary material
Source: PubMed Central journal article supplement (PMC5796678)
Supplement: NIHMS905912-supplement-7.pdf [file NIHMS905912-supplement-7.pdf]

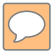

## IC50 (nM) for M cells deleted PSMC subunits treated with BTZ

|                | RPMI8226 | KMS11 |  |  |
|----------------|----------|-------|--|--|
| Control        | 4.5      | 3.2   |  |  |
| PSMC1 deletion | 5.2      | 5.6   |  |  |
| PSMC2 deletion | 5.7      | 4.8   |  |  |
| PSMC3 deletion | 5.8      | 4.8   |  |  |
| PSMC4 deletion | 6.5      | 5.6   |  |  |
| PSMC5 deletion | 5.8      | 6.2   |  |  |
| PSMC6 deletion | 6.7      | 6.6   |  |  |

Table S1
