# Supplementary material
Source: PubMed Central journal article supplement (PMC5796678)

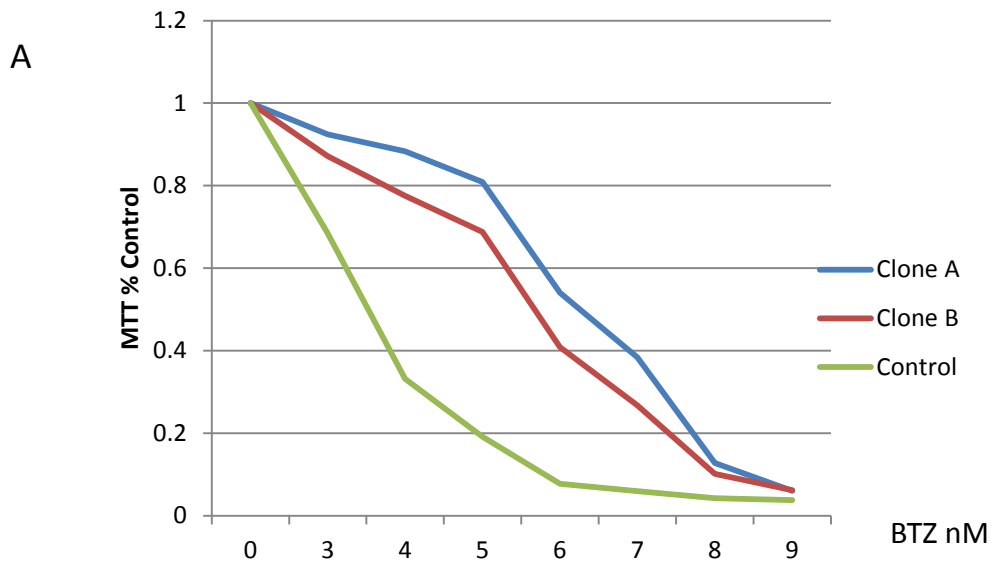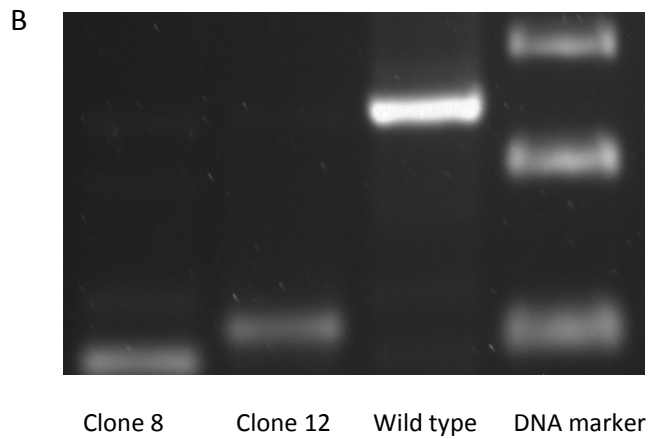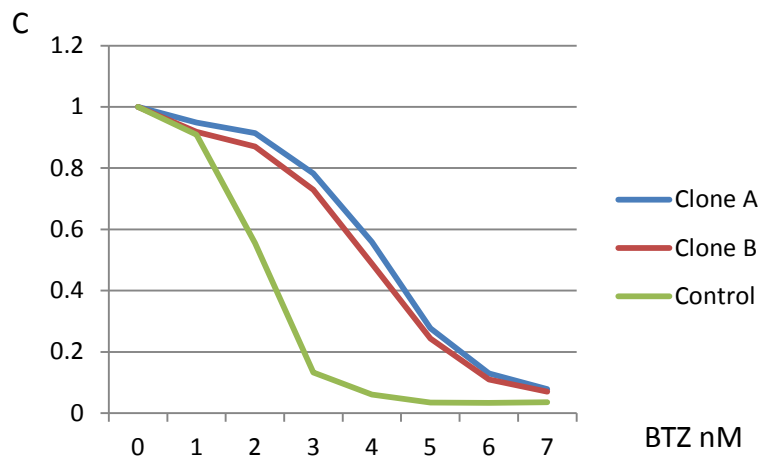

Supplement: NIHMS905912-supplement-8.pdf [file NIHMS905912-supplement-8.pdf]

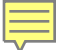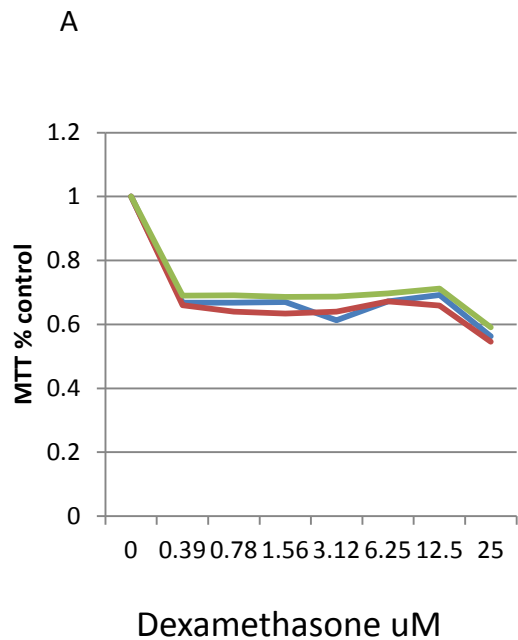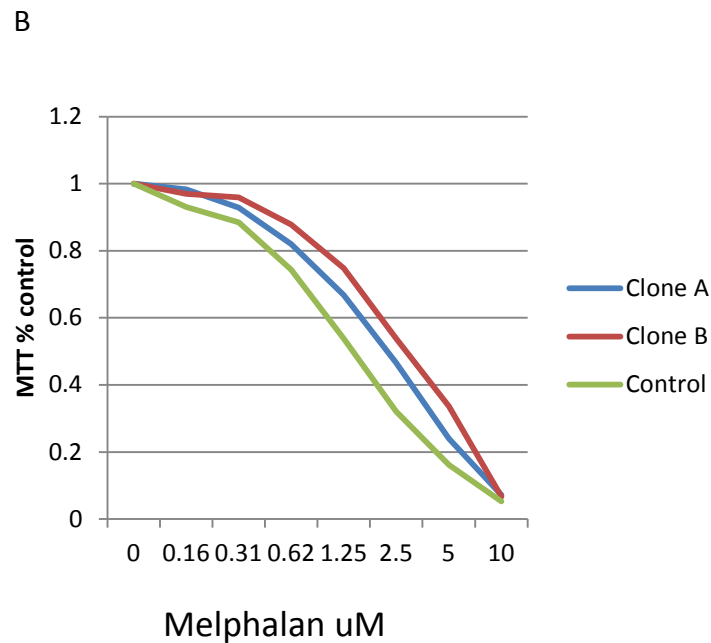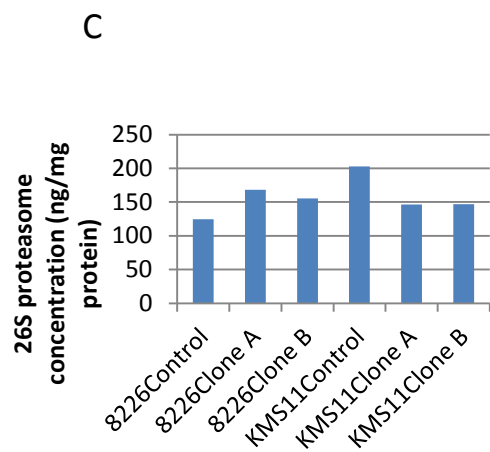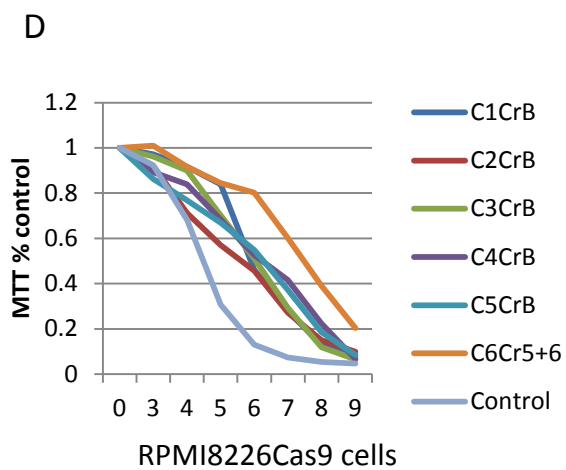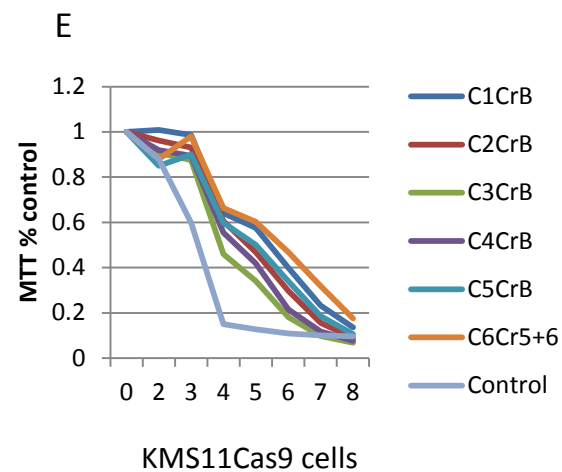

Supplement: NIHMS905912-supplement-9.pdf [file NIHMS905912-supplement-9.pdf]
